# Supplementary material for: Family-Based Interventions Targeting Improvements in Health and Family Outcomes of Children and Adolescents with Type 1 Diabetes: a Systematic Review
Source: Springer Nature journal article supplement (doi:10.1007/s11892-018-0981-9), 2018-02-18
Supplement: MOESM1 [file 15474560]

Supplementary Table 1. Secondary and Tertiary Publications from Identified Family-Based Randomized Controlled Trials

| **Study** | ***N families* (Intervention + Control)** | **Primary Intervention Strategy** | **Number of Intervention Sessions** | **Patient Age Range**+ | **Comparison Group (s)** | **Post-treatment HbA1c Findings**  **(ES)** | **Overview of Ancillary Findings** |
| --- | --- | --- | --- | --- | --- | --- | --- |
| Wysocki et al. (1999) | 119 | BFST | 10 sessions | 12-17 years  *(M = 14.3)* | (1) Standard diabetes care  (2) Education and Support | -- | Improved family communication and problem-solving |
| Wysocki et al. (2001) | 119 | BFST | 10 sessions | 12-17 years  *(M = 14.3)* | (1) Standard diabetes care  (2) Education and Support | -- | Sustained impact of BFST on family conflict;  Delayed effect on adherence (BFST improved at 6, 12 m);  No impact on glycemic control |
| Wysocki et al. (2007) | 104 | BFST | 12 sessions | 11-16 years  *(M = 13.9)* | (1) Standard diabetes care  (2) Educational support | 12 month: *d* = 0.47  18 month: *d* = 0.49 | BFST-D > SC and ES on A1c  BFST-D group more likely to improve adherence than SC and ES |
| Wysocki et al. (2008) | 104 | BFST | 12 sessions | 11-16 years  *(M = 13.9)* | (1) Standard diabetes care  (2) Educational support group | -- | BFST-D improved communication between adolescents and mothers  and correlated with improvements in HbA1c |
| Freeman et al. (2013) | 92 | BFST-Skype | 10 sessions (1-1.5 hours) | 12-19 years  *(M = 14.9)* | BFST-D in clinic | -- | Working alliance equivalent across in-clinic and Skype |
| Riley et al. (2015) | 82 | BFST-Skype | 10 sessions (1-1.5 hours) | 12-19 years  *(M = 14.8)* | BFST-D in clinic | *d* = 0.28 | Collapsed across Skype and clinic groups, improved depression symptoms and HbA1c |
| Ambrosino et al. (2008) | 82 | Coping skills | 6 sessions (1.5 hours) | 8-12 years  *(M = 9.9)* | Group diabetes education | 3 month: *d* = 0.17 | Coping skills group demonstrated greater improvement in family adaptability |
| Hansson et al. (1994) | 25 | Family therapy | 6-11 sessions (1.5 hours) | 8-18 years  *(M = 12.8)* | (1) Practical and emotional support  (2) Standard diabetes care | -- | Increased family closeness and decrease in chaos in combined treatment groups |
| Forsander et al. (2000) | 38 | Family-based psychoeducation | Apartment near clinic for 3-weeks and 24-hour access by telephone | 3-15 years *(median = 9.8)* | Standard diabetes care | 2 year: *d* = -0.22  5 year: *d* = -0.15 | No impact on glycemic control at 2 or 5 years  Significant improvement in family climate for intervention group |
| Carcone et al. (2015) | 146 | MST | *M* = 45.7 sessions | 10-17 years  *(M = 14.2)* | Weekly review of meter and emotional support by phone | **--** | MST participants reported significant improvements in patient-provider relationship qualities |
| Ellis et al. (2004) | 31 | MST | *M* = 46 sessions | Not reported *(M = 13.6)* | Standard diabetes care | 6 month: *d* = 0.69 | MST group had improved adherence, glycemic control, fewer admissions |
| Ellis, Frey, et al. (2005b) | 127 | MST | *M* = 48 sessions | 10-17 years  *(M =13.4)* | Standard diabetes care | **--** | MST associated with reduction in diabetes-related stress  Structural model suggested MST improved glycemic outcomes through adherence |
| Ellis, Templin et al. (2007) | 127 | MST | *M* = 48 sessions | 10-17 years  *(M = 13.2)* | Standard diabetes care | *d* = 0.23  6 month: *d* = 0.06 | MST group: lower DKA admissions at 6-month  Glycemic improvement not maintained at 6-month  Increased blood glucose testing only maintained for 2-parent homes |
| Ellis, Naar-King et al. (2007) | 127 | MST | *M* = 38 sessions | 10-17 years *(M = 13.4)* | Standard diabetes care | **--** | Higher levels of treatment fidelity associated with greater improvement in adherence and glycemic control |
| Ellis et al. (2008) | 127 | MST | *M* = 48 sessions | 10-17 years  *(M = 13.2)* | Standard diabetes care | **--** | MST participants had reduced DKA admissions at 6-, 12-, and 24-month follow up; potential cost-savings |

BFST: Behavioral Family Systems Therapy; BFST-D: Behavioral Family Systems Therapy for Diabetes; CA: Care Ambassador; MST: Multisystemic Therapy; SC: Standard Diabetes Care

*Total sample pre-post effect size. When unavailable, effect sizes were calculated utilizing available outcome means and standard deviations.

+Mean age reported for total sample when available; otherwise intervention group mean age reported
